# Supplementary material for: Effects of surface-functionalized TiO2nanoparticles on copper ion toxicity under simultaneous and sequential exposure conditions
Source: Royal Society of Chemistry journal article supplement (doi:10.1039/d2en00721e), 2022-01-01
Supplement: d2en00721e1.pdf [file d2en00721e1.pdf]

**Supporting Information for**

**Effects of surface-functionalized TiO<sub>2</sub>  
nanoparticles on copper ion toxicity under  
simultaneous and sequential exposure  
conditions**

*Wenhong Fan<sup>a, b</sup>, Yao Li<sup>a</sup>, Ang Li<sup>a</sup>, Xiaomin Li<sup>a</sup>, You Zhang<sup>a</sup>, Shu Liu<sup>a, \*</sup>*

<sup>a</sup> Department of Environmental Science and Engineering, School of Space and

Environment, Beihang University, Beijing 100191, China

<sup>b</sup> Beijing Advanced Innovation Center for Big Data-Based Precision Medicine,

Beihang University, Beijing, 100191, China

## **Zebrafish cultivation and embryo hatching**

The breeding temperature was maintained at 28°C, and the lights in the room were programmed to turn on at 8:00 AM and go off at 22:00 PM for a 14-h light cycle. Sodium chloride and sodium bicarbonate were used to adjust the circulating water quality for a conductivity of 500–550 S cm<sup>-1</sup>, pH of 7.2–7.4, and dissolved organic matter of <1 mg L<sup>-1</sup>. The zebrafish were fed once a day with freshly hatched brine shrimp, and the amount of each feeding ensured that the zebrafish could finish eating within 5 min.

The male and female fish necessary for mating were taken from the circulating water system and placed in spawning tanks the evening before the zebrafish embryos were to hatch. Each tank included two males and one female. When the lights are turned off, the fish house gets dark, and the zebrafish enters into a period of relative inactivity. The next morning, when the light was turned on, the zebrafish entered the excited state. The fish will generally spawn during the first 2 h after the lights come on. To harvest the embryos, remove the insert from the spawning tank. Once the embryos and feces have settled to the bottom of the outer tank, slowly decant the water from the spawning tank into the sink. The embryos that are not developing normally or do not appear to be developing were then removed with a wide mouth pipette. For the follow-up experiments, only healthy embryos were used.

Table S1. Properties of three commercial TiO<sub>2</sub> NPs.

| Commercial name                                         | VK-T02H          | VK-T02SG                        | VK-T02SY                        |
|---------------------------------------------------------|------------------|---------------------------------|---------------------------------|
| Nomenclature                                            | H                | SG                              | SY                              |
| Crystalline phase                                       | rutile           | rutile                          | rutile                          |
| TiO <sub>2</sub> (%)                                    | 88-95            | 82-88                           | 82-88                           |
| Coating                                                 | SiO <sub>2</sub> | SiO <sub>2</sub> , silicone oil | SiO <sub>2</sub> , stearic acid |
| Primary crystallite size(nm)                            | 30               | 30                              | 30                              |
| Surface property                                        | hydrophilic      | hydrophobic                     | hydrophobic                     |
| Specific surface area (m <sup>2</sup> g <sup>-1</sup> ) | 30 ± 15          | 30 ± 15                         | 30 ± 15                         |

Table S2 Two-way ANOVA testing for the influence of type of nano TiO<sub>2</sub>, Cu<sup>2+</sup> concentration, exposure time and exposure scenarios on the mortality of zebrafish embryo.

| Source                                              | Sum of Squares     | df  | Mean Square | F       | Sig.  |
|-----------------------------------------------------|--------------------|-----|-------------|---------|-------|
| Corrected Model                                     | 7.634 <sup>a</sup> | 87  | 0.088       | 31.741  | 0.000 |
| Intercept                                           | 11.474             | 1   | 11.474      | 4150.82 | 0.000 |
| Type of nano TiO <sub>2</sub>                       | 0.027              | 2   | 0.013       | 4.87    | 0.009 |
| Cu <sup>2+</sup> conc.                              | 0.853              | 1   | 0.853       | 308.512 | 0.000 |
| Exposure time                                       | 2                  | 3   | 0.667       | 241.133 | 0.000 |
| Exposure scenarios                                  | 1.489              | 2   | 0.745       | 269.379 | 0.000 |
| Type of nano TiO <sub>2</sub><br>Exposure scenarios | 0.057              | 4   | 0.014       | 5.167   | 0.001 |
| Error                                               | 0.619              | 224 | 0.002       |         |       |
| Total                                               | 20.033             | 312 |             |         |       |
| Corrected Total                                     | 8.253              | 311 |             |         | 60.6  |

a. R Squared = 0.925 (Adjusted R Squared = 0.896)

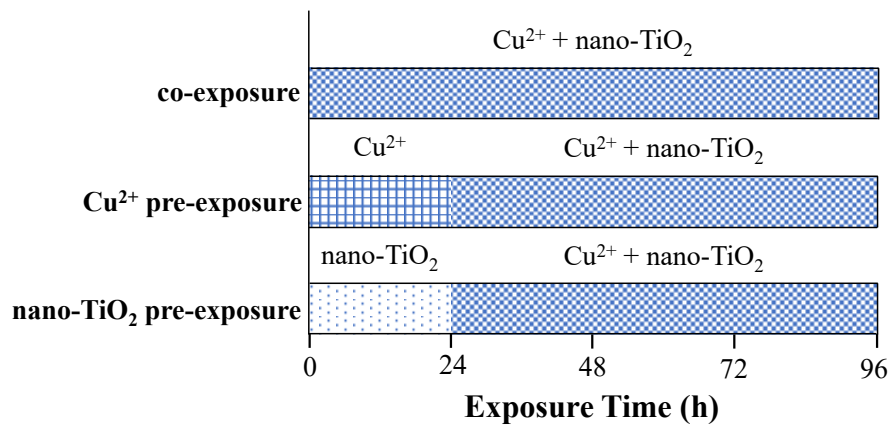

**Figure S1** Operative conditions in different exposure scenarios. The concentrations of nano-TiO<sub>2</sub> and Cu<sup>2+</sup> in individual scenarios were respectively equal to 1 mg-Ti/L and 50 µg-Cu/L.

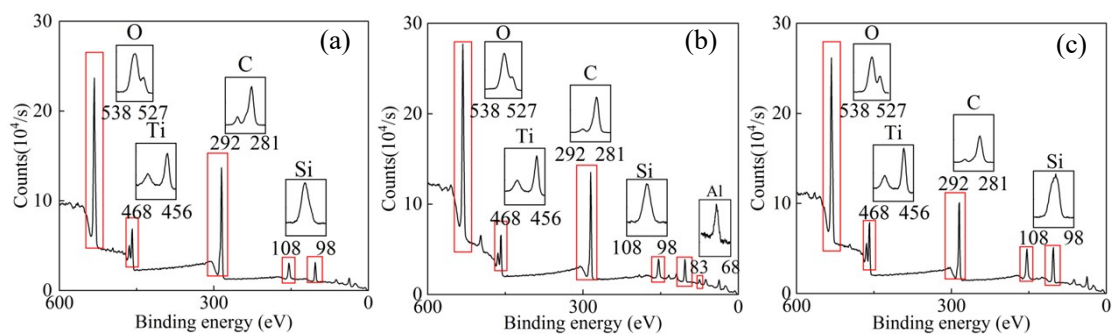

**Figure S2** XPS results for three nano-TiO<sub>2</sub> materials: (a) H; (b) SY; (c) SG (Each peak's expanded image is shown in the small image).

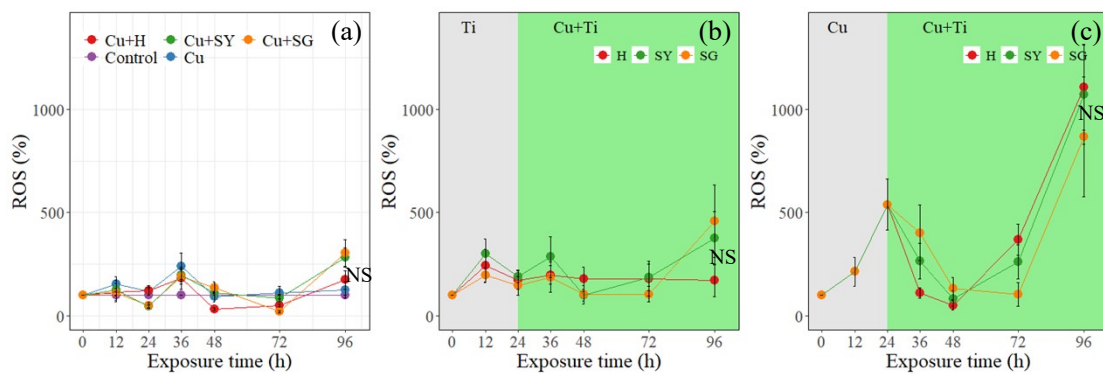

**Figure S3** Endogenous ROS content in zebrafish embryos during a 96-h exposure to three types of nano-TiO<sub>2</sub> under different exposure scenarios: co-exposure (a) TiO<sub>2</sub> pre-exposure (b) and Cu<sup>2+</sup> pre-exposure. Each point is expressed as mean  $\pm$  standard deviation ( $n = 3$ ). NS, not significant.

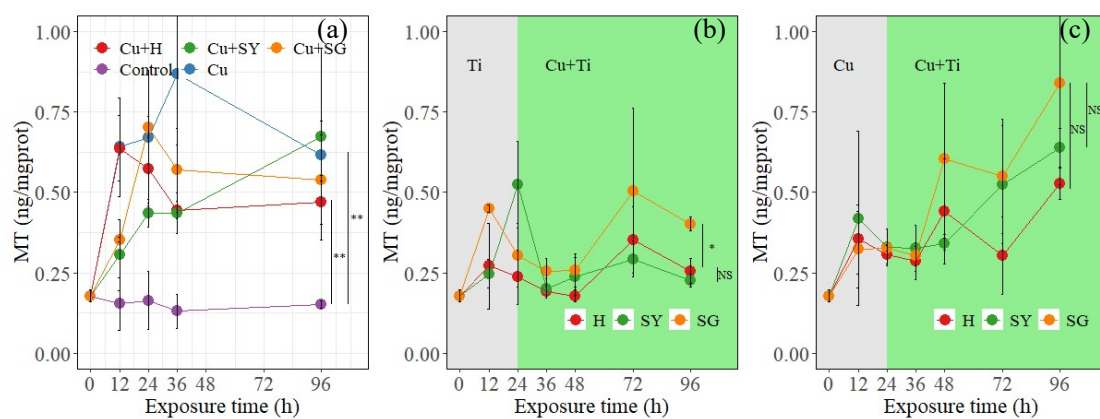

**Figure S4** MT activities in zebrafish embryos during a 96-h exposure to three types of nano-TiO<sub>2</sub> under different exposure scenarios: co-exposure (a) TiO<sub>2</sub> pre-exposure (b) and Cu<sup>2+</sup> pre-exposure. Each point is expressed as mean ± standard deviation ( $n = 3$ ). NS, not significant, \* $p < 0.05$ ; \*\* $p < 0.01$ ; \*\*\* $p < 0.001$  by two-way ANOVA with Tukey's HSD test.



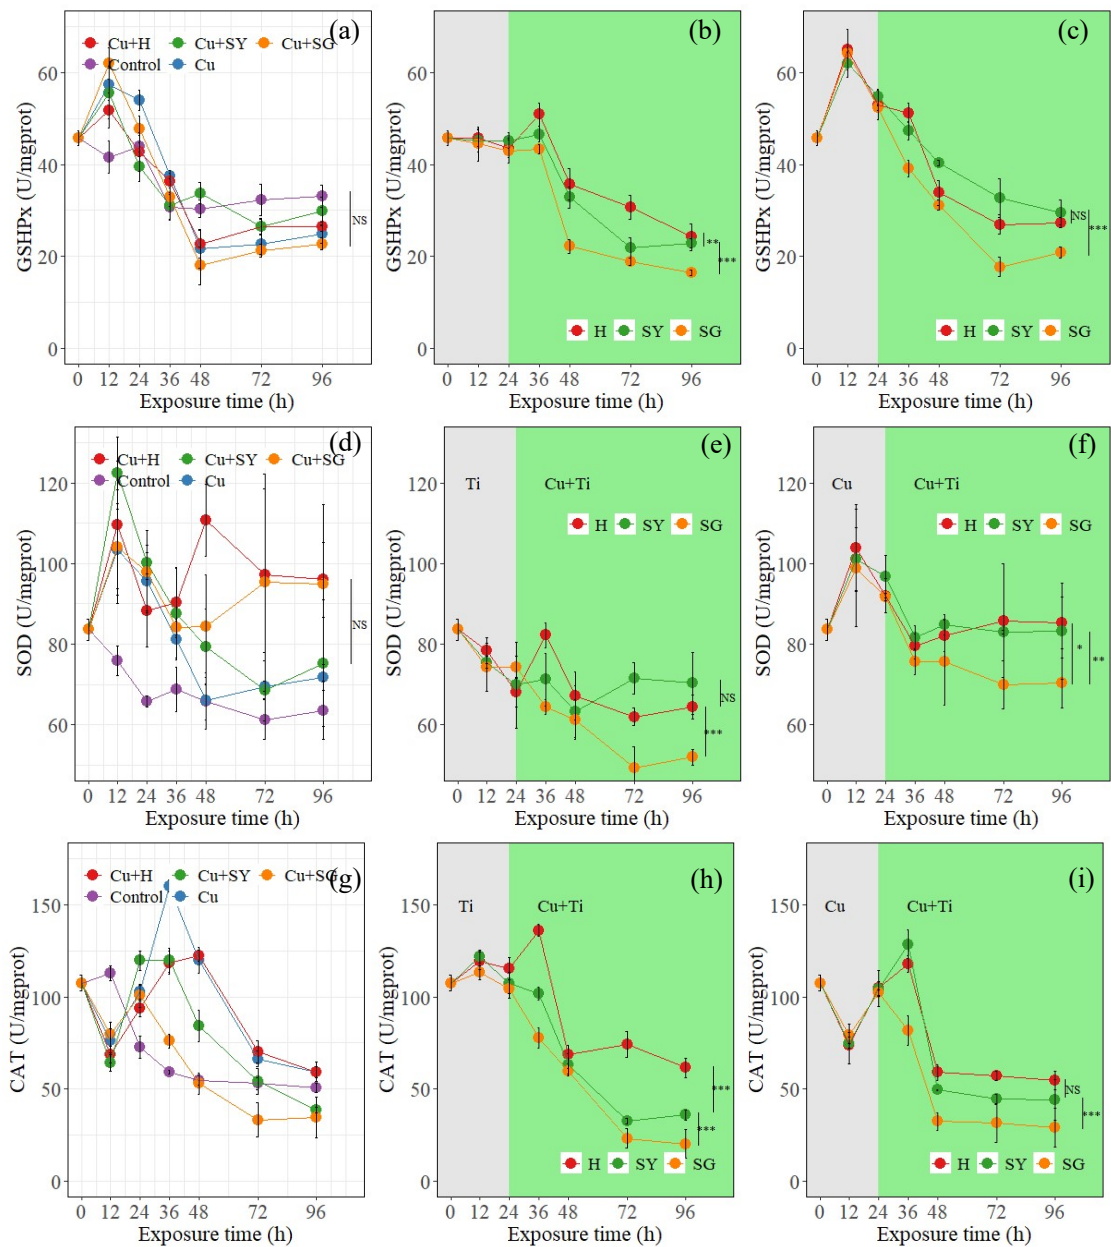

**Figure S5** Antioxidant enzyme activities (GSH-Px: (a-c); SOD: (d-f); CAT:(g-i)) in zebrafish embryos during a 96-h exposure to three types of nano-TiO<sub>2</sub> under different exposure scenarios: co-exposure (a, d, g) TiO<sub>2</sub> pre-exposure (b, e, h) and Cu<sup>2+</sup> pre-exposure (c, f, i). Each point is expressed as mean ± standard deviation ( $n = 3$ ). NS, not significant, \* $p < 0.05$ ; \*\* $p < 0.01$ ; \*\*\* $p < 0.001$  by two-way ANOVA with Tukey's HSD test.

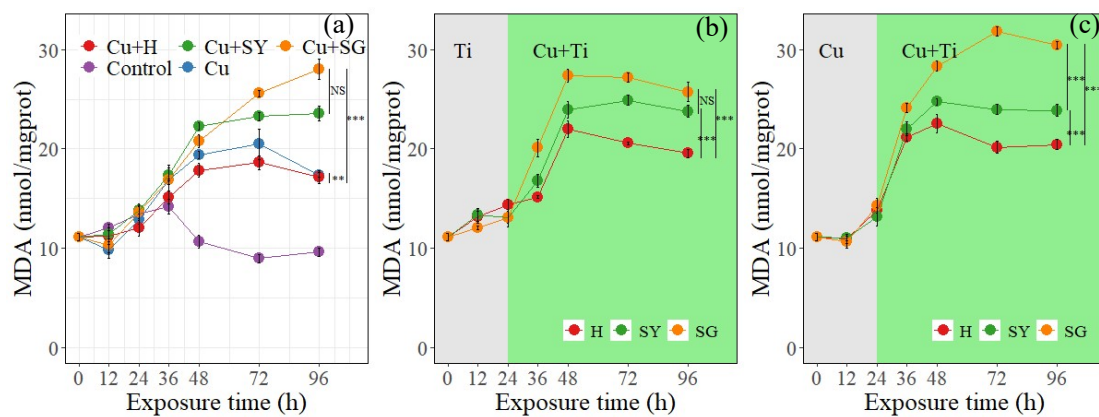

**Figure S6** MDA levels in zebrafish embryos during a 96-h exposure to three types of nano-TiO<sub>2</sub> under different exposure scenarios: co-exposure (a) TiO<sub>2</sub> pre-exposure (b) and Cu<sup>2+</sup> pre-exposure. Each point is expressed as mean ± standard deviation ( $n = 3$ ). NS, not significant, \* $p < 0.05$ ; \*\* $p < 0.01$ ; \*\*\* $p < 0.001$  by two-way ANOVA with Tukey's HSD test.
